# Supplementary material for: Processing Sentences with Literal versus Figurative Use of Verbs: An ERP Study with Children with Language Impairments, Nonverbal Impairments, and Typical Development
Source: Hindawi journal article supplement (doi:10.1155/2015/475271), 2015-01-01
Supplement: f1 [file 475271.f1.pdf]

List of experimental stimuli - each verb listed next to its abstract (congruent, incongruent) and concrete (congruent, incongruent) objects.

| VERBS                 | ABSTRACT OBJECTS                               | CONCRETE OBJECTS                            |
|-----------------------|------------------------------------------------|---------------------------------------------|
| creare (create)       | speranza (hope)<br>pazienza (patience)         | statua (statue)<br>sasso (stone)            |
| preparare (prepare)   | lezione (lesson)<br>speranza (hope)            | frittata (omelette)<br>pioggia (rain)       |
| spegnere (extinguish) | entusiasmo (enthusiasm)<br>ordine (order)      | computer (computer)<br>esercizio (exercise) |
| fare (do)             | riposino (nap)<br>mente (mind)                 | spremuta (juice)<br>polso (wrist)           |
| scaricare (discharge) | rabbia (anger)<br>speranza (hope)              | camion (lorry)<br>insetto (insect)          |
| avviare (start)       | discorso (discourse)<br>salute (health)        | motore (engine)<br>limone (lemon)           |
| rompere (break)       | silenzio (silence)<br>passion (passion)        | polso (wrist)<br>bimbo (baby)               |
| accendere (light)     | speranza (hope)<br>esempio (example)           | televisione (television)<br>borsa (bag)     |
| curare (cure)         | salute (health)<br>scossa (shock)              | bimbo (baby)<br>dentifricio (tooth-paste)   |
| completare (complete) | programma (programme)<br>amicizia (friendship) | palazzo (building)<br>matita (pencil)       |
| tirare (pull)         | somma (sum)<br>lezione (lesson)                | sasso (stone)<br>sole (sun)                 |
| eseguire (perform)    | ordine (order)<br>attenzione (attention)       | esercizio (exercise)<br>camion (lorry)      |
| seguire (follow)      | istinto (instinct)<br>somme (sum)              | strada (street)<br>camicia (shirt)          |
| spezzare (break up)   | legame (tie)<br>rabbia (anger)                 | matita (pencil)<br>strada (street)          |
| portare (bring)       | esempio (example)<br>riposino (nap)            | borsa (bag)<br>casa (house)                 |
| catturare (capture)   | attenzione (attention)                         | insetto (insect)                            |

|                       |                                                     |                                             |
|-----------------------|-----------------------------------------------------|---------------------------------------------|
|                       | relazione (relation)                                | vestito (dress)                             |
| spremere (squeeze)    | mente (mind)<br>progetto (project)                  | limone (lemon)<br>lettera (letter)          |
| rubare (steal)        | parole (words)<br>legame (tie)                      | palla (ball)<br>muro (wall)                 |
| raccogliere (pick up) | forza (strength)<br>noia (boredom)                  | fiori (flowers)<br>palazzo (palace)         |
| coltivare (cultivate) | passione (passion)<br>parole (words)                | pomodori (tomato)<br>computer (computer)    |
| scrivere (write)      | rima (rhyme)<br>silenzio (silence)                  | lettera (letter)<br>pomodori (tomatoes)     |
| ascoltare (listen)    | lamento (complaint)<br>forze (strength)             | pioggia (rain)<br>fiori (flowers)           |
| stendere (lay down)   | progetto (project)<br>bisogno (need)                | vestito (dress)<br>motore (engine)          |
| finire (finish)       | pazienza (patience)<br>istinto (instinct)           | dentifricio (tooth-paste)<br>palla (ball)   |
| superare (overcome)   | ostacolo (obstacle)<br>rima (rhyme)                 | fiume (river)<br>frittata (omelette)        |
| allacciare (fasten)   | amicizia (friendship)<br>programma (programme)      | camicia (shirt)<br>spremuta (juice)         |
| chiudere (close)      | relazione (relationship)<br>entusiasmo (enthusiasm) | casa (home)<br>statua (statue)              |
| prendere (take)       | scossa (shock)<br>lament (lament)                   | sole (sun)<br>fiume (river)                 |
| soddisfare (satisfy)  | bisogno (need)<br>ostacolo (obstacle)               | bambino (child)<br>televisione (television) |
| abbattere (fell)      | noia (boredom)<br>discorso (speech)                 | muro (wall)<br>bambino (child)              |
